# Supplementary material for: Potential use of human hair shaft keratin peptide signatures to distinguish gender and ethnicity
Source: PeerJ. 2020 Jan 30;8:e8248. doi: 10.7717/peerj.8248 (PMC6995659; doi:10.7717/peerj.8248)
Supplement: Data S1 — Analyses were performed using ImageMaster Platinum 7.0 software. [file peerj-08-8248-s001.xlsx]

## Sheet: Gender
	Male	Strip ID	Spot no													Male	Strip ID	Spot no													Male	Strip ID	Spot no													Male	Strip ID	Spot no
		65802	1	FileName	SpotID	Match ID	Pixel X	Pixel Y	Intensity	Area	Vol	%Vol					65802	2	FileName	SpotID	Match ID	Pixel X	Pixel Y	Intensity	Area	Vol	%Vol					65802	3	FileName	SpotID	Match ID	Pixel X	Pixel Y	Intensity	Area	Vol	%Vol					65802	4	FileName
				C:\Users\admin\Documents\ImageMaster\Projects\diena 2\MatchSet\male malay\220617 sample 22 (65802).gda	4548		667	632	0.0706247	6.30828	0.191973	0.0196564							C:\Users\admin\Documents\ImageMaster\Projects\diena 2\MatchSet\male malay\220617 sample 22 (65802).gda	3193	431	655	718	0.360371	16.4302	1.75669	0.179886							C:\Users\admin\Documents\ImageMaster\Projects\diena 2\MatchSet\male malay\220617 sample 22 (65802).gda	3202	430	568	719	0.30163	32.3443	3.51018	0.359318							C:\Users\admin\Documents\ImageMaster\Projects\diena 2\MatchSet\male malay\220617 sample 22 (65802).gda
		65804	1	FileName	SpotID	Match ID	Pixel X	Pixel Y	Intensity	Area	Vol	%Vol					65804	2	FileName	SpotID	Match ID	Pixel X	Pixel Y	Intensity	Area	Vol	%Vol					65804	3	FileName	SpotID	Match ID	Pixel X	Pixel Y	Intensity	Area	Vol	%Vol					65804	4	FileName
				C:\Users\admin\Documents\ImageMaster\Projects\diena 2\MatchSet\male malay\220617 sample 19 (65804).gda	2786		684	632	0.0920312	3.46955	0.103959	0.00951873							C:\Users\admin\Documents\ImageMaster\Projects\diena 2\MatchSet\male malay\220617 sample 19 (65804).gda	3094		680	716	0.345791	11.8424	1.45441	0.133226							C:\Users\admin\Documents\ImageMaster\Projects\diena 2\MatchSet\male malay\220617 sample 19 (65804).gda	3105		597	718	0.341156	19.8424	2.69993	0.247212							C:\Users\admin\Documents\ImageMaster\Projects\diena 2\MatchSet\male malay\220617 sample 19 (65804).gda
		65803	1	FileName	SpotID	Match ID	Pixel X	Pixel Y	Intensity	Area	Vol	%Vol					65803	2	FileName	SpotID	Match ID	Pixel X	Pixel Y	Intensity	Area	Vol	%Vol					65803	3	FileName	SpotID	Match ID	Pixel X	Pixel Y	Intensity	Area	Vol	%Vol					65803	4	FileName
				C:\Users\admin\Documents\ImageMaster\Projects\diena 2\MatchSet\male malay\220617 sample 20 (65803).gda	9307		708	637	0.0604271	6.42298	0.162947	0.0145767							C:\Users\admin\Documents\ImageMaster\Projects\diena 2\MatchSet\male malay\220617 sample 20 (65803).gda	3227	431	702	728	0.343937	15.2259	1.88568	0.16818							C:\Users\admin\Documents\ImageMaster\Projects\diena 2\MatchSet\male malay\220617 sample 20 (65803).gda	3238		618	732	0.318317	23.4267	2.82083	0.251445							C:\Users\admin\Documents\ImageMaster\Projects\diena 2\MatchSet\male malay\220617 sample 20 (65803).gda
		65747	1	FileName	SpotID	Match ID	Pixel X	Pixel Y	Intensity	Area	Vol	%Vol					65747	2	FileName	SpotID	Match ID	Pixel X	Pixel Y	Intensity	Area	Vol	%Vol					65747	3	FileName	SpotID	Match ID	Pixel X	Pixel Y	Intensity	Area	Vol	%Vol					65747	4	FileName
				C:\Users\admin\Documents\ImageMaster\Projects\diena 2\MatchSet\male malay\280417 sample 9 (63482).gda	4247		661	611	0.0838872	4.44447	0.143149	0.0104485							C:\Users\admin\Documents\ImageMaster\Projects\diena 2\MatchSet\male malay\260517 sample 14 (65747).gda	2834		672	664	0.362376	12.7599	1.35596	0.108213							C:\Users\admin\Documents\ImageMaster\Projects\diena 2\MatchSet\male malay\260517 sample 14 (65747).gda	2840		584	666	0.372681	29.3909	5.28234	0.42109							C:\Users\admin\Documents\ImageMaster\Projects\diena 2\MatchSet\male malay\260517 sample 14 (65747).gda
		63482	1	FileName	SpotID	Match ID	Pixel X	Pixel Y	Intensity	Area	Vol	%Vol					63482	2	FileName	SpotID	Match ID	Pixel X	Pixel Y	Intensity	Area	Vol	%Vol					63482	3	FileName	SpotID	Match ID	Pixel X	Pixel Y	Intensity	Area	Vol	%Vol					63482	4	FileName
				C:\Users\admin\Documents\ImageMaster\Projects\diena 2\MatchSet\male malay\260517 sample 14 (65747).gda	8348		684	583	0.0461592	6.79574	0.167302	0.0131159							C:\Users\admin\Documents\ImageMaster\Projects\diena 2\MatchSet\male malay\280417 sample 9 (63482).gda	3101	401	660	694	0.495403	9.9212	1.53759	0.113146							C:\Users\admin\Documents\ImageMaster\Projects\diena 2\MatchSet\male malay\280417 sample 9 (63482).gda	3107		584	695	0.29237	18.7241	1.80088	0.132488							C:\Users\admin\Documents\ImageMaster\Projects\diena 2\MatchSet\male malay\280417 sample 9 (63482).gda
		65805	1	FileName	SpotID	Match ID	Pixel X	Pixel Y	Intensity	Area	Vol	%Vol					65805	2	FileName	SpotID	Match ID	Pixel X	Pixel Y	Intensity	Area	Vol	%Vol					65805	3	FileName	SpotID	Match ID	Pixel X	Pixel Y	Intensity	Area	Vol	%Vol					65805	4	FileName
				C:\Users\admin\Documents\ImageMaster\Projects\diena 2\MatchSet\male malay\220617 sample 16 (65805).gda	2930		659	606	0.0380092	7.74198	0.122276	0.0126483							C:\Users\admin\Documents\ImageMaster\Projects\diena 2\MatchSet\male malay\220617 sample 16 (65805).gda	3312	401	657	691	0.176646	11.2689	0.703649	0.0729209							C:\Users\admin\Documents\ImageMaster\Projects\diena 2\MatchSet\male malay\220617 sample 16 (65805).gda	3303		566	692	0.162235	22.9105	1.4142	0.146517							C:\Users\admin\Documents\ImageMaster\Projects\diena 2\MatchSet\male malay\220617 sample 16 (65805).gda
		63479	1	FileName	SpotID	Match ID	Pixel X	Pixel Y	Intensity	Area	Vol	%Vol					63479	2	FileName	SpotID	Match ID	Pixel X	Pixel Y	Intensity	Area	Vol	%Vol					63479	3	FileName	SpotID	Match ID	Pixel X	Pixel Y	Intensity	Area	Vol	%Vol					63479	4	FileName
				C:\Users\admin\Documents\ImageMaster\Projects\diena 2\MatchSet\male malay\280417 sample 13 (63479).gda	8020		682	612	0.0213763	5.01795	0.0618997	0.00680577							C:\Users\admin\Documents\ImageMaster\Projects\diena 2\MatchSet\male malay\280417 sample 13 (63479).gda	2953		683	698	0.218107	5.96419	0.479255	0.0439275							C:\Users\admin\Documents\ImageMaster\Projects\diena 2\MatchSet\male malay\280417 sample 13 (63479).gda	2945		605	696	0.161898	18.9535	0.990792	0.0908063							C:\Users\admin\Documents\ImageMaster\Projects\diena 2\MatchSet\male malay\280417 sample 13 (63479).gda
		61383	1	FileName	SpotID	Match ID	Pixel X	Pixel Y	Intensity	Area	Vol	%Vol					61383	2	FileName	SpotID	Match ID	Pixel X	Pixel Y	Intensity	Area	Vol	%Vol					61383	3	FileName	SpotID	Match ID	Pixel X	Pixel Y	Intensity	Area	Vol	%Vol					61383	4	FileName
				C:\Users\admin\Documents\ImageMaster\Projects\diena 2\MatchSet\male malay\151117 sample 25 (61383).gda	84526		2590	2564	0.0843761	6.89235	0.0962209	0.0136992							C:\Users\admin\Documents\ImageMaster\Projects\diena 2\MatchSet\male malay\151117 sample 25 (61383).gda	84551		2562	2955	0.220275	8.77583	0.786429	0.109547							C:\Users\admin\Documents\ImageMaster\Projects\diena 2\MatchSet\male malay\151117 sample 25 (61383).gda	84563		2231	2954	0.305385	16.5499	1.92151	0.26542							C:\Users\admin\Documents\ImageMaster\Projects\diena 2\MatchSet\male malay\151117 sample 25 (61383).gda
		66462	1	FileName	SpotID	Match ID	Pixel X	Pixel Y	Intensity	Area	Vol	%Vol					66462	2	FileName	SpotID	Match ID	Pixel X	Pixel Y	Intensity	Area	Vol	%Vol					66462	3	FileName	SpotID	Match ID	Pixel X	Pixel Y	Intensity	Area	Vol	%Vol					66462	4	FileName
				C:\Users\admin\Documents\ImageMaster\Projects\diena 2\MatchSet\male malay\120817 sample 28 (66462).gda	17873		1363	1359	0.0600405	4.65236	0.115134	0.0101351							C:\Users\admin\Documents\ImageMaster\Projects\diena 2\MatchSet\male malay\120817 sample 28 (66462).gda	17900		1354	1515	0.511415	11.5341	2.20198	0.191603							C:\Users\admin\Documents\ImageMaster\Projects\diena 2\MatchSet\male malay\120817 sample 28 (66462).gda	17912		1189	1514	0.392362	14.9893	2.92284	0.252295							C:\Users\admin\Documents\ImageMaster\Projects\diena 2\MatchSet\male malay\120817 sample 28 (66462).gda
		66636	1	FileName	SpotID	Match ID	Pixel X	Pixel Y	Intensity	Area	Vol	%Vol					66636	2	FileName	SpotID	Match ID	Pixel X	Pixel Y	Intensity	Area	Vol	%Vol					66636	3	FileName	SpotID	Match ID	Pixel X	Pixel Y	Intensity	Area	Vol	%Vol					66636	4	FileName
				C:\Users\admin\Documents\ImageMaster\Projects\diena 2\MatchSet\male malay\061017 sample 23 (66636).gda	34282		1277	1298	0.127665	5.84233	0.27692	0.0311979							C:\Users\admin\Documents\ImageMaster\Projects\diena 2\MatchSet\male malay\061017 sample 23 (66636).gda	34309		1269	1468	0.538214	13.5771	2.51316	0.27758							C:\Users\admin\Documents\ImageMaster\Projects\diena 2\MatchSet\male malay\061017 sample 23 (66636).gda	34321		1098	1468	0.40794	12.9391	2.50022	0.273691							C:\Users\admin\Documents\ImageMaster\Projects\diena 2\MatchSet\male malay\061017 sample 23 (66636).gda
	Female	Spot ID	Spot no.													Female	Spot ID	Spot no.													Female	Spot ID	Spot no.													Female	Spot ID	Spot no.
		63489	1	FileName	SpotID	Match ID	Pixel X	Pixel Y	Intensity	Area	Vol	%Vol					63489	2	FileName	SpotID	Match ID	Pixel X	Pixel Y	Intensity	Area	Vol	%Vol					63489	3	FileName	SpotID	Match ID	Pixel X	Pixel Y	Intensity	Area	Vol	%Vol					63489	4	FileName
				C:\Users\admin\Documents\ImageMaster\Projects\diena 2\MatchSet\female malay\210417 sample 2 (63489).gda	15923		1348	1191	0.121445	5.56276	0.338699	0.0330529							C:\Users\admin\Documents\ImageMaster\Projects\diena 2\MatchSet\female malay\210417 sample 2 (63489).gda	15948		1344	1363	0.610375	15.6202	3.16743	0.30268							C:\Users\admin\Documents\ImageMaster\Projects\diena 2\MatchSet\female malay\210417 sample 2 (63489).gda	15950		1185	1367	0.545139	27.6417	5.42243	0.515223							C:\Users\admin\Documents\ImageMaster\Projects\diena 2\MatchSet\female malay\210417 sample 2 (63489).gda
		63480	1	FileName	SpotID	Match ID	Pixel X	Pixel Y	Intensity	Area	Vol	%Vol					63480	2	FileName	SpotID	Match ID	Pixel X	Pixel Y	Intensity	Area	Vol	%Vol					63480	3	FileName	SpotID	Match ID	Pixel X	Pixel Y	Intensity	Area	Vol	%Vol					63480	4	FileName
				C:\Users\admin\Documents\ImageMaster\Projects\diena 2\MatchSet\female malay\280417 sample 12 (63480).gda	15976		1342	1209	0.119401	4.35845	0.180155	0.0173639							C:\Users\admin\Documents\ImageMaster\Projects\diena 2\MatchSet\female malay\280417 sample 12 (63480).gda	16002		1334	1378	0.557999	16.0646	3.38082	0.320757							C:\Users\admin\Documents\ImageMaster\Projects\diena 2\MatchSet\female malay\280417 sample 12 (63480).gda	16015		1178	1384	0.451543	21.4768	4.40802	0.414313							C:\Users\admin\Documents\ImageMaster\Projects\diena 2\MatchSet\female malay\280417 sample 12 (63480).gda
		63483	1	FileName	SpotID	Match ID	Pixel X	Pixel Y	Intensity	Area	Vol	%Vol					63483	2	FileName	SpotID	Match ID	Pixel X	Pixel Y	Intensity	Area	Vol	%Vol					63483	3	FileName	SpotID	Match ID	Pixel X	Pixel Y	Intensity	Area	Vol	%Vol					63483	4	FileName
				C:\Users\admin\Documents\ImageMaster\Projects\diena 2\MatchSet\female malay\210417 sample 8 (63483).gda	20952		1423	1271	0.140266	6.75273	0.183981	0.0201395							C:\Users\admin\Documents\ImageMaster\Projects\diena 2\MatchSet\female malay\210417 sample 8 (63483).gda	20956		1419	1439	0.21998	9.75633	0.779408	0.0851491							C:\Users\admin\Documents\ImageMaster\Projects\diena 2\MatchSet\female malay\210417 sample 8 (63483).gda	20957		1258	1439	0.162835	19.699	1.33587	0.145729							C:\Users\admin\Documents\ImageMaster\Projects\diena 2\MatchSet\female malay\210417 sample 8 (63483).gda
		63484	1	FileName	SpotID	Match ID	Pixel X	Pixel Y	Intensity	Area	Vol	%Vol					63484	2	FileName	SpotID	Match ID	Pixel X	Pixel Y	Intensity	Area	Vol	%Vol					63484	3	FileName	SpotID	Match ID	Pixel X	Pixel Y	Intensity	Area	Vol	%Vol					63484	4	FileName
				C:\Users\admin\Documents\ImageMaster\Projects\diena 2\MatchSet\female malay\210417 sample 7 (63484).gda	17630		1400	1249	0.0769889	4.66669	0.11766	0.0150594							C:\Users\admin\Documents\ImageMaster\Projects\diena 2\MatchSet\female malay\210417 sample 7 (63484).gda	17662		1397	1414	0.343384	11.3692	1.32531	0.165664							C:\Users\admin\Documents\ImageMaster\Projects\diena 2\MatchSet\female malay\210417 sample 7 (63484).gda	17675		1226	1417	0.334953	20.2152	2.70304	0.333992							C:\Users\admin\Documents\ImageMaster\Projects\diena 2\MatchSet\female malay\210417 sample 7 (63484).gda
		63485	1	FileName	SpotID	Match ID	Pixel X	Pixel Y	Intensity	Area	Vol	%Vol					63485	2	FileName	SpotID	Match ID	Pixel X	Pixel Y	Intensity	Area	Vol	%Vol					63485	3	FileName	SpotID	Match ID	Pixel X	Pixel Y	Intensity	Area	Vol	%Vol					63485	4	FileName
				C:\Users\admin\Documents\ImageMaster\Projects\diena 2\MatchSet\female malay\210417 sample 6 (63485).gda	17950		1396	1210	0.116676	5.04662	0.218875	0.0243206							C:\Users\admin\Documents\ImageMaster\Projects\diena 2\MatchSet\female malay\210417 sample 6 (63485).gda	17966		1391	1368	0.389628	16.2725	2.37369	0.260415							C:\Users\admin\Documents\ImageMaster\Projects\diena 2\MatchSet\female malay\210417 sample 6 (63485).gda	17967		1213	1369	0.294329	19.1327	2.56435	0.280542							C:\Users\admin\Documents\ImageMaster\Projects\diena 2\MatchSet\female malay\210417 sample 6 (63485).gda
		63486	1	FileName	SpotID	Match ID	Pixel X	Pixel Y	Intensity	Area	Vol	%Vol					63486	2	FileName	SpotID	Match ID	Pixel X	Pixel Y	Intensity	Area	Vol	%Vol					63486	3	FileName	SpotID	Match ID	Pixel X	Pixel Y	Intensity	Area	Vol	%Vol					63486	4	FileName
				C:\Users\admin\Documents\ImageMaster\Projects\diena 2\MatchSet\female malay\210417 sample 5 (63486).gda	16326		1400	1220	0.158832	6.73122	0.320624	0.0446837							C:\Users\admin\Documents\ImageMaster\Projects\diena 2\MatchSet\female malay\210417 sample 5 (63486).gda	16349		1387	1381	0.474027	16.846	2.37724	0.323953							C:\Users\admin\Documents\ImageMaster\Projects\diena 2\MatchSet\female malay\210417 sample 5 (63486).gda	16350		1228	1385	0.373106	24.2797	3.92144	0.531545							C:\Users\admin\Documents\ImageMaster\Projects\diena 2\MatchSet\female malay\210417 sample 5 (63486).gda
		63487	1	FileName	SpotID	Match ID	Pixel X	Pixel Y	Intensity	Area	Vol	%Vol					63487	2	FileName	SpotID	Match ID	Pixel X	Pixel Y	Intensity	Area	Vol	%Vol					63487	3	FileName	SpotID	Match ID	Pixel X	Pixel Y	Intensity	Area	Vol	%Vol					63487	4	FileName
				C:\Users\admin\Documents\ImageMaster\Projects\diena 2\MatchSet\female malay\210417 sample 4 (63487).gda	16128		1285	1228	0.131154	6.509	0.411501	0.0374173							C:\Users\admin\Documents\ImageMaster\Projects\diena 2\MatchSet\female malay\210417 sample 4 (63487).gda	16153		1277	1417	0.47573	25.2618	4.71651	0.416921							C:\Users\admin\Documents\ImageMaster\Projects\diena 2\MatchSet\female malay\210417 sample 4 (63487).gda	16168		1127	1416	0.494807	26.7743	5.91821	0.511971							C:\Users\admin\Documents\ImageMaster\Projects\diena 2\MatchSet\female malay\210417 sample 4 (63487).gda
		sample 1	1	FileName	SpotID	Match ID	Pixel X	Pixel Y	Intensity	Area	Vol	%Vol					sample 1	2	FileName	SpotID	Match ID	Pixel X	Pixel Y	Intensity	Area	Vol	%Vol					sample 1	3	FileName	SpotID	Match ID	Pixel X	Pixel Y	Intensity	Area	Vol	%Vol					sample 1	4	FileName
				C:\Users\admin\Documents\ImageMaster\Projects\diena 2\MatchSet\female malay\210417 sample 1.gda	17608		1354	1202	0.117187	5.18999	0.24342	0.0249553							C:\Users\admin\Documents\ImageMaster\Projects\diena 2\MatchSet\female malay\210417 sample 1.gda	17636		1344	1374	0.643675	14.7241	3.22668	0.322667							C:\Users\admin\Documents\ImageMaster\Projects\diena 2\MatchSet\female malay\210417 sample 1.gda	17649		1190	1378	0.541051	18.4302	3.81767	0.37574							C:\Users\admin\Documents\ImageMaster\Projects\diena 2\MatchSet\female malay\210417 sample 1.gda
		sample 27	1	FileName	SpotID	Match ID	Pixel X	Pixel Y	Intensity	Area	Vol	%Vol					sample 27	2	FileName	SpotID	Match ID	Pixel X	Pixel Y	Intensity	Area	Vol	%Vol					sample 27	3	FileName	SpotID	Match ID	Pixel X	Pixel Y	Intensity	Area	Vol	%Vol					sample 27	4	FileName
				C:\Users\admin\Documents\ImageMaster\Projects\diena 2\MatchSet\female malay\120817 sample 27.gda	16633		1381	1302	0.0654365	7.82083	0.203837	0.0255081							C:\Users\admin\Documents\ImageMaster\Projects\diena 2\MatchSet\female malay\120817 sample 27.gda	16661		1359	1467	0.433731	14.3227	1.88027	0.229831							C:\Users\admin\Documents\ImageMaster\Projects\diena 2\MatchSet\female malay\120817 sample 27.gda	16672		1186	1462	0.295749	14.9177	2.13849	0.258643							C:\Users\admin\Documents\ImageMaster\Projects\diena 2\MatchSet\female malay\120817 sample 27.gda
		66640	1	FileName	SpotID	Match ID	Pixel X	Pixel Y	Intensity	Area	Vol	%Vol					66640	2	FileName	SpotID	Match ID	Pixel X	Pixel Y	Intensity	Area	Vol	%Vol					66640	3	FileName	SpotID	Match ID	Pixel X	Pixel Y	Intensity	Area	Vol	%Vol					66640	4	FileName
				C:\Users\admin\Documents\ImageMaster\Projects\diena 2\MatchSet\female malay\061017 sample 15 (66640).gda	18033		1289	1270	0.0992948	3.09679	0.121593	0.0143167							C:\Users\admin\Documents\ImageMaster\Projects\diena 2\MatchSet\female malay\061017 sample 15 (66640).gda	18063		1282	1446	0.343945	12.6882	1.46618	0.170042							C:\Users\admin\Documents\ImageMaster\Projects\diena 2\MatchSet\female malay\061017 sample 15 (66640).gda	18074		1109	1443	0.334244	16.7098	2.27877	0.262375							C:\Users\admin\Documents\ImageMaster\Projects\diena 2\MatchSet\female malay\061017 sample 15 (66640).gda
[truncated: 30 more columns]

## Sheet: Ethnicity
	Malay	Strip ID	Spot no.													Malay	Strip ID	Spot no.													Malay	Strip ID	Spot no.													Malay	Strip ID	Spot no.
		63489	7	FileName	SpotID	Match ID	Pixel X	Pixel Y	Intensity	Area	Vol	%Vol					63489	8	FileName	SpotID	Match ID	Pixel X	Pixel Y	Intensity	Area	Vol	%Vol					63489	9	FileName	SpotID	Match ID	Pixel X	Pixel Y	Intensity	Area	Vol	%Vol					63489	10	FileName
				C:\Users\admin\Documents\ImageMaster\Projects\diena 2\MatchSet\female malay\210417 sample 2 (63489).gda	15868		1175	852	0.386477	20.1435	5.82246	0.656222							C:\Users\admin\Documents\ImageMaster\Projects\diena 2\MatchSet\female malay\210417 sample 2 (63489).gda	15898		1295	1047	0.69818	17.6488	4.87396	0.505121							C:\Users\admin\Documents\ImageMaster\Projects\diena 2\MatchSet\female malay\210417 sample 2 (63489).gda	15922		1465	1186	0.258986	12.1434	1.0813	0.105556							C:\Users\admin\Documents\ImageMaster\Projects\diena 2\MatchSet\female malay\210417 sample 2 (63489).gda
		63480	7	FileName	SpotID	Match ID	Pixel X	Pixel Y	Intensity	Area	Vol	%Vol					63480	8	FileName	SpotID	Match ID	Pixel X	Pixel Y	Intensity	Area	Vol	%Vol					63480	9	FileName	SpotID	Match ID	Pixel X	Pixel Y	Intensity	Area	Vol	%Vol					63480	10	FileName
				C:\Users\admin\Documents\ImageMaster\Projects\diena 2\MatchSet\female malay\280417 sample 12 (63480).gda	15924		1177	870	0.636776	15.8997	7.26677	0.842466							C:\Users\admin\Documents\ImageMaster\Projects\diena 2\MatchSet\female malay\280417 sample 12 (63480).gda	15951		1216	1069	0.567452	16.7313	3.62846	0.361778							C:\Users\admin\Documents\ImageMaster\Projects\diena 2\MatchSet\female malay\280417 sample 12 (63480).gda	15975		1459	1207	0.373106	11.7778	1.16885	0.112677							C:\Users\admin\Documents\ImageMaster\Projects\diena 2\MatchSet\female malay\280417 sample 12 (63480).gda
		63483	7	FileName	SpotID	Match ID	Pixel X	Pixel Y	Intensity	Area	Vol	%Vol					63483	8	FileName	SpotID	Match ID	Pixel X	Pixel Y	Intensity	Area	Vol	%Vol					63483	9	FileName	SpotID	Match ID	Pixel X	Pixel Y	Intensity	Area	Vol	%Vol					63483	10	FileName
				C:\Users\admin\Documents\ImageMaster\Projects\diena 2\MatchSet\female malay\210417 sample 8 (63483).gda	20919		1283	921	0.880432	10.9105	6.60685	0.75274							C:\Users\admin\Documents\ImageMaster\Projects\diena 2\MatchSet\female malay\210417 sample 8 (63483).gda	20923		1314	1121	0.27687	10.1291	1.20379	0.13412							C:\Users\admin\Documents\ImageMaster\Projects\diena 2\MatchSet\female malay\210417 sample 8 (63483).gda	20951		1549	1274	0.112417	12.7743	0.453181	0.0496175							C:\Users\admin\Documents\ImageMaster\Projects\diena 2\MatchSet\female malay\210417 sample 8 (63483).gda
		63484	7	FileName	SpotID	Match ID	Pixel X	Pixel Y	Intensity	Area	Vol	%Vol					63484	8	FileName	SpotID	Match ID	Pixel X	Pixel Y	Intensity	Area	Vol	%Vol					63484	9	FileName	SpotID	Match ID	Pixel X	Pixel Y	Intensity	Area	Vol	%Vol					63484	10	FileName
				C:\Users\admin\Documents\ImageMaster\Projects\diena 2\MatchSet\female malay\210417 sample 7 (63484).gda	17592		1244	902	0.54812	13.5055	5.33277	0.728082							C:\Users\admin\Documents\ImageMaster\Projects\diena 2\MatchSet\female malay\210417 sample 7 (63484).gda	17610		1278	1101	0.441919	11.3191	1.59994	0.211145							C:\Users\admin\Documents\ImageMaster\Projects\diena 2\MatchSet\female malay\210417 sample 7 (63484).gda	17629		1516	1243	0.0913817	14.8603	0.476999	0.0610604							C:\Users\admin\Documents\ImageMaster\Projects\diena 2\MatchSet\female malay\210417 sample 7 (63484).gda
		63485	7	FileName	SpotID	Match ID	Pixel X	Pixel Y	Intensity	Area	Vol	%Vol					63485	8	FileName	SpotID	Match ID	Pixel X	Pixel Y	Intensity	Area	Vol	%Vol					63485	9	FileName	SpotID	Match ID	Pixel X	Pixel Y	Intensity	Area	Vol	%Vol					63485	10	FileName
				C:\Users\admin\Documents\ImageMaster\Projects\diena 2\MatchSet\female malay\210417 sample 6 (63485).gda	17910		1240	879	0.469939	13.3693	3.83652	0.44929							C:\Users\admin\Documents\ImageMaster\Projects\diena 2\MatchSet\female malay\210417 sample 6 (63485).gda	17930		1267	1072	0.34117	14.9822	2.57725	0.291019							C:\Users\admin\Documents\ImageMaster\Projects\diena 2\MatchSet\female malay\210417 sample 6 (63485).gda	17949		1516	1204	0.119742	12.6667	0.670975	0.0745743							C:\Users\admin\Documents\ImageMaster\Projects\diena 2\MatchSet\female malay\210417 sample 6 (63485).gda
		63486	7	FileName	SpotID	Match ID	Pixel X	Pixel Y	Intensity	Area	Vol	%Vol					63486	8	FileName	SpotID	Match ID	Pixel X	Pixel Y	Intensity	Area	Vol	%Vol					63486	9	FileName	SpotID	Match ID	Pixel X	Pixel Y	Intensity	Area	Vol	%Vol					63486	10	FileName
				C:\Users\admin\Documents\ImageMaster\Projects\diena 2\MatchSet\female malay\210417 sample 5 (63486).gda	16279		1229	916	0.388777	15.3908	4.02685	0.589491							C:\Users\admin\Documents\ImageMaster\Projects\diena 2\MatchSet\female malay\210417 sample 5 (63486).gda	16300		1345	1079	0.263414	10.7958	1.18095	0.170073							C:\Users\admin\Documents\ImageMaster\Projects\diena 2\MatchSet\female malay\210417 sample 5 (63486).gda	16325		1509	1212	0.281895	13.147	0.748784	0.104401							C:\Users\admin\Documents\ImageMaster\Projects\diena 2\MatchSet\female malay\210417 sample 5 (63486).gda
		63487	7	FileName	SpotID	Match ID	Pixel X	Pixel Y	Intensity	Area	Vol	%Vol					63487	8	FileName	SpotID	Match ID	Pixel X	Pixel Y	Intensity	Area	Vol	%Vol					63487	9	FileName	SpotID	Match ID	Pixel X	Pixel Y	Intensity	Area	Vol	%Vol					63487	10	FileName
				C:\Users\admin\Documents\ImageMaster\Projects\diena 2\MatchSet\female malay\210417 sample 4 (63487).gda	16076		1168	839	0.297906	21.8353	4.43419	0.433253							C:\Users\admin\Documents\ImageMaster\Projects\diena 2\MatchSet\female malay\210417 sample 4 (63487).gda	16079		1243	1081	0.570348	17.656	4.67157	0.451393							C:\Users\admin\Documents\ImageMaster\Projects\diena 2\MatchSet\female malay\210417 sample 4 (63487).gda	16127		1406	1228	0.190684	21.4912	1.77512	0.161471							C:\Users\admin\Documents\ImageMaster\Projects\diena 2\MatchSet\female malay\210417 sample 4 (63487).gda
		sample 1	7	FileName	SpotID	Match ID	Pixel X	Pixel Y	Intensity	Area	Vol	%Vol					sample 1	8	FileName	SpotID	Match ID	Pixel X	Pixel Y	Intensity	Area	Vol	%Vol					sample 1	9	FileName	SpotID	Match ID	Pixel X	Pixel Y	Intensity	Area	Vol	%Vol					sample 1	10	FileName
				C:\Users\admin\Documents\ImageMaster\Projects\diena 2\MatchSet\female malay\210417 sample 1.gda	17554		1181	841	0.555614	14.4302	6.45321	0.717485							C:\Users\admin\Documents\ImageMaster\Projects\diena 2\MatchSet\female malay\210417 sample 1.gda	17578		1297	1048	0.277466	14.0359	1.36264	0.14633							C:\Users\admin\Documents\ImageMaster\Projects\diena 2\MatchSet\female malay\210417 sample 1.gda	17607		1467	1200	0.254898	14.8101	1.14725	0.117646							C:\Users\admin\Documents\ImageMaster\Projects\diena 2\MatchSet\female malay\210417 sample 1.gda
		sample 27	7	FileName	SpotID	Match ID	Pixel X	Pixel Y	Intensity	Area	Vol	%Vol					sample 27	8	FileName	SpotID	Match ID	Pixel X	Pixel Y	Intensity	Area	Vol	%Vol					sample 27	9	FileName	SpotID	Match ID	Pixel X	Pixel Y	Intensity	Area	Vol	%Vol					sample 27	10	FileName
				C:\Users\admin\Documents\ImageMaster\Projects\diena 2\MatchSet\female malay\120817 sample 27.gda	16580		1214	981	0.3223	15.6488	4.10604	0.554115							C:\Users\admin\Documents\ImageMaster\Projects\diena 2\MatchSet\female malay\120817 sample 27.gda	16602		1323	1157	0.337974	14.5162	1.72427	0.227782							C:\Users\admin\Documents\ImageMaster\Projects\diena 2\MatchSet\female malay\120817 sample 27.gda	16632		1487	1305	0.11597	10.9033	0.438241	0.0548555							C:\Users\admin\Documents\ImageMaster\Projects\diena 2\MatchSet\female malay\120817 sample 27.gda
		66640	7	FileName	SpotID	Match ID	Pixel X	Pixel Y	Intensity	Area	Vol	%Vol					66640	8	FileName	SpotID	Match ID	Pixel X	Pixel Y	Intensity	Area	Vol	%Vol					66640	9	FileName	SpotID	Match ID	Pixel X	Pixel Y	Intensity	Area	Vol	%Vol					66640	10	FileName
				C:\Users\admin\Documents\ImageMaster\Projects\diena 2\MatchSet\female malay\061017 sample 15 (66640).gda	17984		1120	902	0.607101	10.7671	3.74688	0.462642							C:\Users\admin\Documents\ImageMaster\Projects\diena 2\MatchSet\female malay\061017 sample 15 (66640).gda	18001		1152	1118	0.303346	12.8244	1.39878	0.169799							C:\Users\admin\Documents\ImageMaster\Projects\diena 2\MatchSet\female malay\061017 sample 15 (66640).gda	18032		1419	1270	0.346635	11.1398	0.607139	0.0714968							C:\Users\admin\Documents\ImageMaster\Projects\diena 2\MatchSet\female malay\061017 sample 15 (66640).gda
	Chinese	Strip ID	Spot no.													Chinese	Strip ID	Spot no.													Chinese	Strip ID	Spot no.													Chinese	Strip ID	Spot no.
		63488	7	FileName	SpotID	Match ID	Pixel X	Pixel Y	Intensity	Area	Vol	%Vol					63488	8	FileName	SpotID	Match ID	Pixel X	Pixel Y	Intensity	Area	Vol	%Vol					63488	9	FileName	SpotID	Match ID	Pixel X	Pixel Y	Intensity	Area	Vol	%Vol					63488	10	FileName
				C:\Users\admin\Documents\ImageMaster\Projects\diena 2\MatchSet\female chinese\210417 sample 3 (63488).gda	1733	464	578	435	0.771507	21.6775	10.0306	0.874765							C:\Users\admin\Documents\ImageMaster\Projects\diena 2\MatchSet\female chinese\210417 sample 3 (63488).gda	2057	389	639	540	0.331291	14.3943	1.51246	0.13092							C:\Users\admin\Documents\ImageMaster\Projects\diena 2\MatchSet\female chinese\210417 sample 3 (63488).gda	2254	311	725	608	0.100409	9.34772	0.371088	0.0320569							C:\Users\admin\Documents\ImageMaster\Projects\diena 2\MatchSet\female chinese\210417 sample 3 (63488).gda
		63481	7	FileName	SpotID	Match ID	Pixel X	Pixel Y	Intensity	Area	Vol	%Vol					63481	8	FileName	SpotID	Match ID	Pixel X	Pixel Y	Intensity	Area	Vol	%Vol					63481	9	FileName	SpotID	Match ID	Pixel X	Pixel Y	Intensity	Area	Vol	%Vol					63481	10	FileName
				C:\Users\admin\Documents\ImageMaster\Projects\diena 2\MatchSet\female chinese\280417 sample 11 (63481).gda	2062		587	450	0.656109	26.2941	10.7688	0.954114							C:\Users\admin\Documents\ImageMaster\Projects\diena 2\MatchSet\female chinese\280417 sample 11 (63481).gda	2410	381	630	547	0.41126	13.0753	2.10894	0.186283							C:\Users\admin\Documents\ImageMaster\Projects\diena 2\MatchSet\female chinese\280417 sample 11 (63481).gda	2679	311	760	617	0.0497362	9.46242	0.180582	0.015949							C:\Users\admin\Documents\ImageMaster\Projects\diena 2\MatchSet\female chinese\280417 sample 11 (63481).gda
		66456	7	FileName	SpotID	Match ID	Pixel X	Pixel Y	Intensity	Area	Vol	%Vol					66456	8	FileName	SpotID	Match ID	Pixel X	Pixel Y	Intensity	Area	Vol	%Vol					66456	9	FileName	SpotID	Match ID	Pixel X	Pixel Y	Intensity	Area	Vol	%Vol					66456	10	FileName
				C:\Users\admin\Documents\ImageMaster\Projects\diena 2\MatchSet\female chinese\011518 sample 21 (66456).gda	75957		2355	2095	0.239483	14.2721	2.66461	0.471736							C:\Users\admin\Documents\ImageMaster\Projects\diena 2\MatchSet\female chinese\011518 sample 21 (66456).gda	75959		2604	2565	0.225605	8.35827	0.943152	0.166594							C:\Users\admin\Documents\ImageMaster\Projects\diena 2\MatchSet\female chinese\011518 sample 21 (66456).gda	75963		2945	2911	0.178677	9.03031	0.662941	0.115723							C:\Users\admin\Documents\ImageMaster\Projects\diena 2\MatchSet\female chinese\011518 sample 21 (66456).gda
		66454	7	FileName	SpotID	Match ID	Pixel X	Pixel Y	Intensity	Area	Vol	%Vol					66454	8	FileName	SpotID	Match ID	Pixel X	Pixel Y	Intensity	Area	Vol	%Vol					66454	9	FileName	SpotID	Match ID	Pixel X	Pixel Y	Intensity	Area	Vol	%Vol					66454	10	FileName
				C:\Users\admin\Documents\ImageMaster\Projects\diena 2\MatchSet\female chinese\011518 sample 29 (66454).gda	71945		2461	2144	0.589167	12.5374	2.68452	0.484049							C:\Users\admin\Documents\ImageMaster\Projects\diena 2\MatchSet\female chinese\011518 sample 29 (66454).gda	71969		2586	2629	0.408847	15.6915	2.59413	0.454491							C:\Users\admin\Documents\ImageMaster\Projects\diena 2\MatchSet\female chinese\011518 sample 29 (66454).gda	71995		2912	3011	0.221953	10.5142	0.691792	0.113185							C:\Users\admin\Documents\ImageMaster\Projects\diena 2\MatchSet\female chinese\011518 sample 29 (66454).gda
		65744	7	FileName	SpotID	Match ID	Pixel X	Pixel Y	Intensity	Area	Vol	%Vol					65744	8	FileName	SpotID	Match ID	Pixel X	Pixel Y	Intensity	Area	Vol	%Vol					65744	9	FileName	SpotID	Match ID	Pixel X	Pixel Y	Intensity	Area	Vol	%Vol					65744	10	FileName
				C:\Users\admin\Documents\ImageMaster\Projects\diena 2\MatchSet\female chinese\011518 sample 32 (65744).gda	74016		2301	1988	0.344936	11.8833	2.65363	0.438646							C:\Users\admin\Documents\ImageMaster\Projects\diena 2\MatchSet\female chinese\011518 sample 32 (65744).gda	74034		2608	2527	0.289608	14.3259	1.64342	0.260643							C:\Users\admin\Documents\ImageMaster\Projects\diena 2\MatchSet\female chinese\011518 sample 32 (65744).gda	74058		2939	2885	0.155486	12.4263	0.689149	0.103379							C:\Users\admin\Documents\ImageMaster\Projects\diena 2\MatchSet\female chinese\011518 sample 32 (65744).gda
		66638	7	FileName	SpotID	Match ID	Pixel X	Pixel Y	Intensity	Area	Vol	%Vol					66638	8	FileName	SpotID	Match ID	Pixel X	Pixel Y	Intensity	Area	Vol	%Vol					66638	9	FileName	SpotID	Match ID	Pixel X	Pixel Y	Intensity	Area	Vol	%Vol					66638	10	FileName
				C:\Users\admin\Documents\ImageMaster\Projects\diena 2\MatchSet\female chinese\061017 sample 21 (66638).gda	18170		1190	889	0.252639	7.68463	1.51651	0.208812							C:\Users\admin\Documents\ImageMaster\Projects\diena 2\MatchSet\female chinese\061017 sample 21 (66638).gda	18173		1321	1078	0.14291	9.53411	0.601683	0.0819101							C:\Users\admin\Documents\ImageMaster\Projects\diena 2\MatchSet\female chinese\061017 sample 21 (66638).gda	18185		1485	1204	0.0883708	5.60577	0.204409	0.0274332							C:\Users\admin\Documents\ImageMaster\Projects\diena 2\MatchSet\female chinese\061017 sample 21 (66638).gda
		66250	7	FileName	SpotID	Match ID	Pixel X	Pixel Y	Intensity	Area	Vol	%Vol					66250	8	FileName	SpotID	Match ID	Pixel X	Pixel Y	Intensity	Area	Vol	%Vol					66250	9														66250	10	FileName
				C:\Users\admin\Documents\ImageMaster\Projects\diena 2\MatchSet\female chinese\sample 32 (66250).gda	73215		2288	2238	0.667321	11.3976	6.07297	0.922697							C:\Users\admin\Documents\ImageMaster\Projects\diena 2\MatchSet\female chinese\sample 32 (66250).gda	73219		2506	2744	0.310424	10.0858	1.10409	0.165246																						C:\Users\admin\Documents\ImageMaster\Projects\diena 2\MatchSet\female chinese\sample 32 (66250).gda
		6625	7	FileName	SpotID	Match ID	Pixel X	Pixel Y	Intensity	Area	Vol	%Vol					6625	8	FileName	SpotID	Match ID	Pixel X	Pixel Y	Intensity	Area	Vol	%Vol					6625	9	FileName	SpotID	Match ID	Pixel X	Pixel Y	Intensity	Area	Vol	%Vol					6625	10	FileName
				C:\Users\admin\Documents\ImageMaster\Projects\diena 2\MatchSet\female chinese\sample 21 (6625).gda	78577		2368	1807	0.462989	10.102	3.38748	0.589357							C:\Users\admin\Documents\ImageMaster\Projects\diena 2\MatchSet\female chinese\sample 21 (6625).gda	78588		2607	2183	0.341558	11.593	1.66619	0.284916							C:\Users\admin\Documents\ImageMaster\Projects\diena 2\MatchSet\female chinese\sample 21 (6625).gda	78614		2925	2499	0.270526	10.507	0.594074	0.0957877							C:\Users\admin\Documents\ImageMaster\Projects\diena 2\MatchSet\female chinese\sample 21 (6625).gda
		6634	7	FileName	SpotID	Match ID	Pixel X	Pixel Y	Intensity	Area	Vol	%Vol					6634	8														6634	9	FileName	SpotID	Match ID	Pixel X	Pixel Y	Intensity	Area	Vol	%Vol					6634	10
				C:\Users\admin\Documents\ImageMaster\Projects\diena 2\MatchSet\female chinese\sample 29 (6634).gda	84129		2325	1805	0.790852	9.1683	5.01812	0.820554																						C:\Users\admin\Documents\ImageMaster\Projects\diena 2\MatchSet\female chinese\120817 sample 26 (66464).gda	17697		1517	1329	0.162392	5.63444	0.362309	0.0376528
		66464	7	FileName	SpotID	Match ID	Pixel X	Pixel Y	Intensity	Area	Vol	%Vol					66464	8	FileName	SpotID	Match ID	Pixel X	Pixel Y	Intensity	Area	Vol	%Vol					66464	9														66464	10	FileName
				C:\Users\admin\Documents\ImageMaster\Projects\diena 2\MatchSet\female chinese\120817 sample 26 (66464).gda	17658		1230	1014	0.639205	11.2832	5.60184	0.617295							C:\Users\admin\Documents\ImageMaster\Projects\diena 2\MatchSet\female chinese\120817 sample 26 (66464).gda	17676		1344	1182	0.444694	12.5449	1.91765	0.206916																						C:\Users\admin\Documents\ImageMaster\Projects\diena 2\MatchSet\female chinese\120817 sample 26 (66464).gda
	Indian	Strip ID	Spot no.													Indian	Strip ID	Spot no.													Indian	Strip ID	Spot no.													Indian	Strip ID	Spot no.
		67530	7	FileName	SpotID	Match ID	Pixel X	Pixel Y	Intensity	Area	Vol	%Vol					67530	8	FileName	SpotID	Match ID	Pixel X	Pixel Y	Intensity	Area	Vol	%Vol					67530	9	FileName	SpotID	Match ID	Pixel X	Pixel Y	Intensity	Area	Vol	%Vol					67530	10	FileName
				C:\Users\admin\Documents\ImageMaster\Projects\diena 2\MatchSet\female indian\67530 FI sample 41.gda	84587		2537	1255	0.883144	14.8528	8.62218	1.32538							C:\Users\admin\Documents\ImageMaster\Projects\diena 2\MatchSet\female indian\67530 FI sample 41.gda	84598		1941	1357	0.453649	3.82251	1.21319	0.181845							C:\Users\admin\Documents\ImageMaster\Projects\diena 2\MatchSet\female indian\67530 FI sample 41.gda	84599		3120	1756	0.227216	7.32604	0.662932	0.0992274							C:\Users\admin\Documents\ImageMaster\Projects\diena 2\MatchSet\female indian\67530 FI sample 41.gda
		61756	7	FileName	SpotID	Match ID	Pixel X	Pixel Y	Intensity	Area	Vol	%Vol					61756	8	FileName	SpotID	Match ID	Pixel X	Pixel Y	Intensity	Area	Vol	%Vol					61756	9	FileName	SpotID	Match ID	Pixel X	Pixel Y	Intensity	Area	Vol	%Vol					61756	10	FileName
				C:\Users\admin\Documents\ImageMaster\Projects\diena 2\MatchSet\female indian\sample 33 61756.gda	94369		2346	1281	0.735067	14.4155	7.37204	1.11903							C:\Users\admin\Documents\ImageMaster\Projects\diena 2\MatchSet\female indian\sample 33 61756.gda	94386		2591	1559	0.196206	7.63248	0.632366	0.0932469							C:\Users\admin\Documents\ImageMaster\Projects\diena 2\MatchSet\female indian\sample 33 61756.gda	94411		2908	1799	0.219671	10.5948	0.953303	0.136113							C:\Users\admin\Documents\ImageMaster\Projects\diena 2\MatchSet\female indian\sample 33 61756.gda
		66513	7	FileName	SpotID	Match ID	Pixel X	Pixel Y	Intensity	Area	Vol	%Vol					66513	8	FileName	SpotID	Match ID	Pixel X	Pixel Y	Intensity	Area	Vol	%Vol					66513	9	FileName	SpotID	Match ID	Pixel X	Pixel Y	Intensity	Area	Vol	%Vol					66513	10	FileName
				C:\Users\admin\Documents\ImageMaster\Projects\diena 2\MatchSet\female indian\indian female sample 30 (66513).gda	94373		2559	1400	0.259843	8.85647	0.574162	0.0856636							C:\Users\admin\Documents\ImageMaster\Projects\diena 2\MatchSet\female indian\indian female sample 30 (66513).gda	67895		2500	2160	0.225879	6.6558	0.67608	0.101629							C:\Users\admin\Documents\ImageMaster\Projects\diena 2\MatchSet\female indian\indian female sample 30 (66513).gda	67921		2843	2477	0.249892	6.80454	0.76086	0.109615							C:\Users\admin\Documents\ImageMaster\Projects\diena 2\MatchSet\female indian\indian female sample 30 (66513).gda
		67326	7	FileName	SpotID	Match ID	Pixel X	Pixel Y	Intensity	Area	Vol	%Vol					67326	8	FileName	SpotID	Match ID	Pixel X	Pixel Y	Intensity	Area	Vol	%Vol					67326	9	FileName	SpotID	Match ID	Pixel X	Pixel Y	Intensity	Area	Vol	%Vol					67326	10	FileName
				C:\Users\admin\Documents\ImageMaster\Projects\diena\MatchSet\female indian 2\67326 sample 37.gda	84084		2440	1227	0.479629	21.5104	7.41407	1.10997							C:\Users\admin\Documents\ImageMaster\Projects\diena\MatchSet\female indian 2\67326 sample 37.gda	30261		2659	1456	0.170998	5.91387	0.500875	0.0743444							C:\Users\admin\Documents\ImageMaster\Projects\diena\MatchSet\female indian 2\67326 sample 37.gda	34526		3005	1700	0.317755	8.16115	1.04226	0.149213							C:\Users\admin\Documents\ImageMaster\Projects\diena\MatchSet\female indian 2\67326 sample 37.gda
		67328	7	FileName	SpotID	Match ID	Pixel X	Pixel Y	Intensity	Area	Vol	%Vol					67328	8	FileName	SpotID	Match ID	Pixel X	Pixel Y	Intensity	Area	Vol	%Vol					67328	9	FileName	SpotID	Match ID	Pixel X	Pixel Y	Intensity	Area	Vol	%Vol					67328	10	FileName
				C:\Users\admin\Documents\ImageMaster\Projects\diena\MatchSet\female indian 2\67328 sample 35.gda	82790		2425	1161	0.334698	18.6305	4.73824	0.764963							C:\Users\admin\Documents\ImageMaster\Projects\diena\MatchSet\female indian 2\67328 sample 35.gda	82794		2651	1419	0.145366	7.11815	0.404284	0.065089							C:\Users\admin\Documents\ImageMaster\Projects\diena\MatchSet\female indian 2\67328 sample 35.gda	82810		3000	1650	0.157878	6.92461	0.449153	0.0701826							C:\Users\admin\Documents\ImageMaster\Projects\diena\MatchSet\female indian 2\67328 sample 35.gda
		67327	7	FileName	SpotID	Match ID	Pixel X	Pixel Y	Intensity	Area	Vol	%Vol					67327	8	FileName	SpotID	Match ID	Pixel X	Pixel Y	Intensity	Area	Vol	%Vol					67327	9	FileName	SpotID	Match ID	Pixel X	Pixel Y	Intensity	Area	Vol	%Vol					67327	10	FileName
				C:\Users\admin\Documents\ImageMaster\Projects\diena\MatchSet\female indian 2\67327 sample 36.gda	89837		2406	1140	0.406121	11.3493	2.35168	0.427443							C:\Users\admin\Documents\ImageMaster\Projects\diena\MatchSet\female indian 2\67327 sample 36.gda	94371		2742	1396	0.0955924	6.55186	0.30089	0.04496							C:\Users\admin\Documents\ImageMaster\Projects\diena\MatchSet\female indian 2\67327 sample 36.gda	89856		3090	1636	0.0789825	8.46222	0.202092	0.0359034							C:\Users\admin\Documents\ImageMaster\Projects\diena\MatchSet\female indian 2\67327 sample 36.gda
		67331	7	FileName	SpotID	Match ID	Pixel X	Pixel Y	Intensity	Area	Vol	%Vol					67331	8	FileName	SpotID	Match ID	Pixel X	Pixel Y	Intensity	Area	Vol	%Vol					67331	9	FileName	SpotID	Match ID	Pixel X	Pixel Y	Intensity	Area	Vol	%Vol					67331	10	FileName
				C:\Users\admin\Documents\ImageMaster\Projects\diena\MatchSet\female indian 3\67331 FI sample 34.gda	78565		2545	1257	0.49527	17.0553	6.73866	1.10123							C:\Users\admin\Documents\ImageMaster\Projects\diena\MatchSet\female indian 3\67331 FI sample 34.gda	78568		2767	1550	0.226694	11.7776	1.35566	0.218672							C:\Users\admin\Documents\ImageMaster\Projects\diena\MatchSet\female indian 3\67331 FI sample 34.gda	78577		3083	1737	0.246592	6.40849	0.718861	0.11204							C:\Users\admin\Documents\ImageMaster\Projects\diena\MatchSet\female indian 3\67331 FI sample 34.gda
		67325	7	FileName	SpotID	Match ID	Pixel X	Pixel Y	Intensity	Area	Vol	%Vol					67325	8	FileName	SpotID	Match ID	Pixel X	Pixel Y	Intensity	Area	Vol	%Vol					67325	9	FileName	SpotID	Match ID	Pixel X	Pixel Y	Intensity	Area	Vol	%Vol					67325	10	FileName
				C:\Users\admin\Documents\ImageMaster\Projects\diena\MatchSet\female indian 3\67325 sample 38.gda	89143		2456	1105	0.594671	15.5356	6.80636	1.19834							C:\Users\admin\Documents\ImageMaster\Projects\diena\MatchSet\female indian 3\67325 sample 38.gda	89156		2690	1366	0.223219	7.06977	0.6802	0.117505							C:\Users\admin\Documents\ImageMaster\Projects\diena\MatchSet\female indian 3\67325 sample 38.gda	89182		3041	1582	0.219309	5.74004	0.623636	0.104012							C:\Users\admin\Documents\ImageMaster\Projects\diena\MatchSet\female indian 3\67325 sample 38.gda
		61761	7	FileName	SpotID	Match ID	Pixel X	Pixel Y	Intensity	Area	Vol	%Vol					61761	8	FileName	SpotID	Match ID	Pixel X	Pixel Y	Intensity	Area	Vol	%Vol					61761	9	FileName	SpotID	Match ID	Pixel X	Pixel Y	Intensity	Area	Vol	%Vol					61761	10	FileName
				C:\Users\admin\Documents\ImageMaster\Projects\diena\MatchSet\female indian 3\61761 sample 31 female indian.gda	85815		2391	1221	0.219306	13.2399	1.9169	0.370097							C:\Users\admin\Documents\ImageMaster\Projects\diena\MatchSet\female indian 3\61761 sample 31 female indian.gda	85769		2635	1546	0.18032	9.48012	0.751525	0.161207							C:\Users\admin\Documents\ImageMaster\Projects\diena\MatchSet\female indian 3\61761 sample 31 female indian.gda	85823		2965	1692	0.106001	10.3134	0.404769	0.0773208							C:\Users\admin\Documents\ImageMaster\Projects\diena\MatchSet\female indian 3\61761 sample 31 female indian.gda
		61381	7	FileName	SpotID	Match ID	Pixel X	Pixel Y	Intensity	Area	Vol	%Vol					61381	8	FileName	SpotID	Match ID	Pixel X	Pixel Y	Intensity	Area	Vol	%Vol					61381	9	FileName	SpotID	Match ID	Pixel X	Pixel Y	Intensity	Area	Vol	%Vol					61381	10	FileName
				C:\Users\admin\Documents\ImageMaster\Projects\diena 2\MatchSet\female indian\010418 sample 24 (61381).gda	94372		2707	1474	0.130104	9.35826	0.437922	0.0653929							C:\Users\admin\Documents\ImageMaster\Projects\diena 2\MatchSet\female indian\010418 sample 24 (61381).gda	94371		2742	1396	0.0955924	6.55186	0.30089	0.04496							C:\Users\admin\Documents\ImageMaster\Projects\diena 2\MatchSet\female indian\010418 sample 24 (61381).gda	87955		2902	2751	0.173838	17.8133	0.51198	0.0869898							C:\Users\admin\Documents\ImageMaster\Projects\diena 2\MatchSet\female indian\010418 sample 24 (61381).gda
[truncated: 19 more columns]
